# Supplementary material for: Lipid Differences and Related Metabolism Present on the Hand Skin Surface of Different-Aged Asiatic Females—An Untargeted Metabolomics Study
Source: MDPI journal article supplement (doi:10.3390/metabo13040553), 2023-04-13
Supplement: s1 [file s1]

**Supplementary Table S1.** The detailed ion source conditions of quadrupole time-of-flight mass spectrometry.

| Parameters              | ESI+        |
|-------------------------|-------------|
| Sample temperature      | 10 °C       |
| Column temperature      | 50 °C       |
| Analysis mode           | sensitivity |
| Capillary voltage       | 3000 V      |
| Ion source temperature  | 120 °C      |
| Desolvation temperature | 500 °C      |
| Cone gas flow           | 50 L/h      |
| Desolvation gas flow    | 900 L/h     |
